# Supplementary material for: Preclinical activity of selinexor, an inhibitor of XPO1, in sarcoma
Source: PubMed Central journal article supplement (PMC4941336; doi:10.18632/oncotarget.7667), 2016-02-24
Supplement: oncotarget-07-16581-s001.pdf [file oncotarget-07-16581-s001.pdf]

# Preclinical activity of selinexor, an inhibitor of XPO1, in sarcoma

## Supplementary Materials

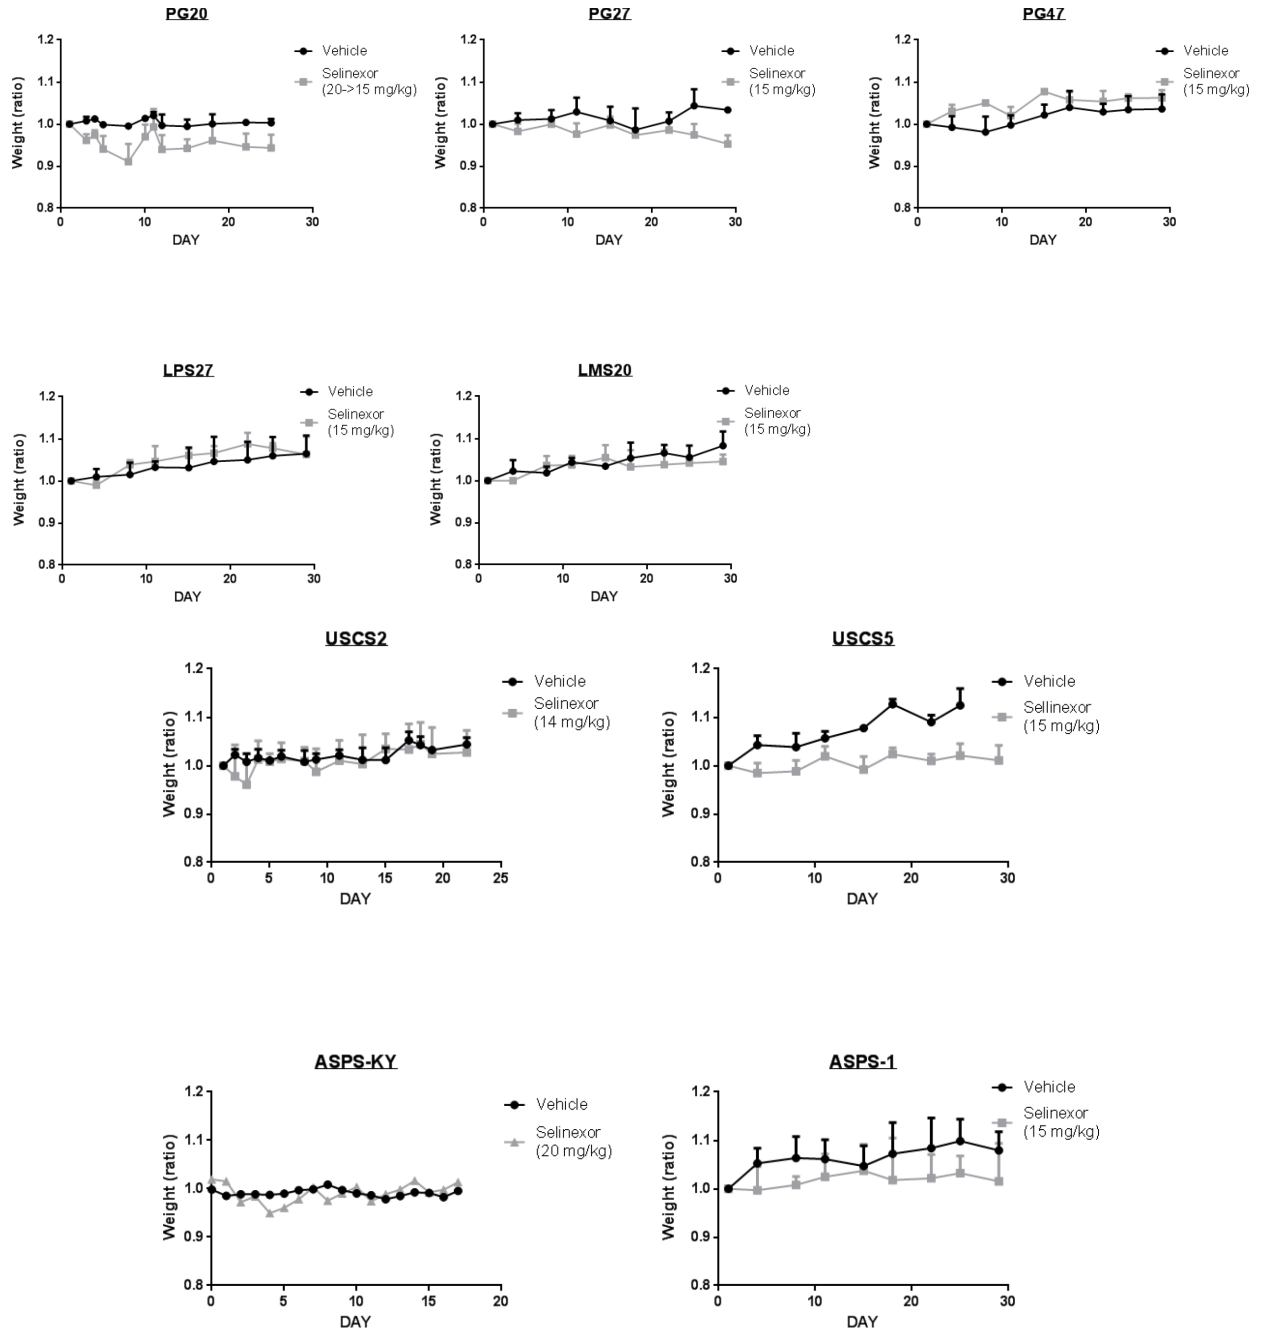

**Supplementary Figure S1: Change in mice weight by selinexor treatment in each sarcoma xenograft model.** The Y-axis indicates average changes in weight from day 1.

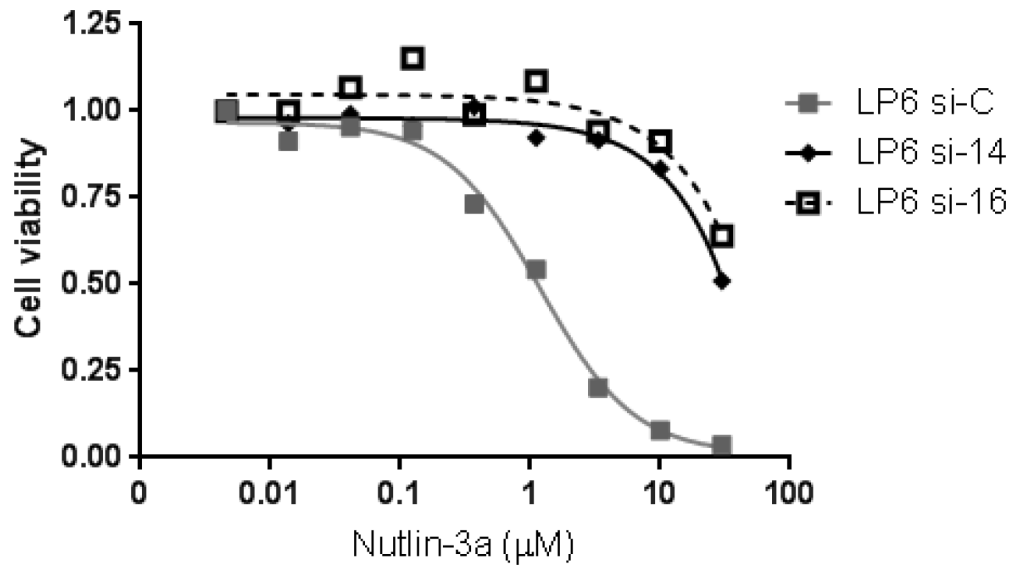

Supplementary Figure S2: Cell viability assay in the p53-knocked down LP6 lines following the 72-hour exposure to the serial concentration of Nutlin-3a.

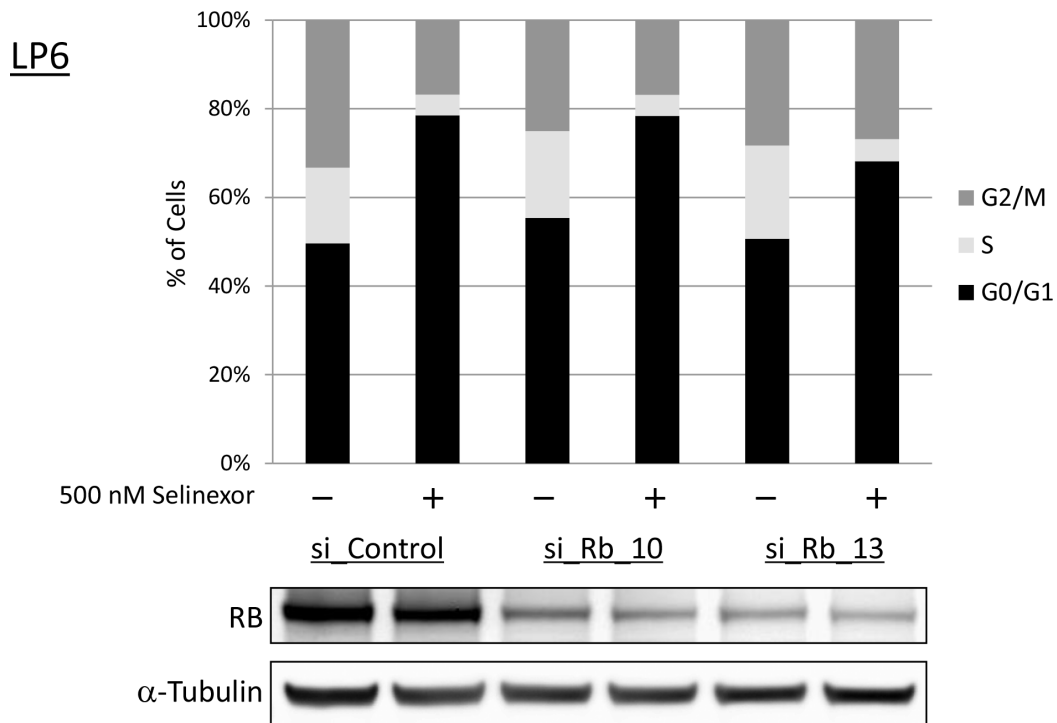

Supplementary Figure S3: Selinexor induced cell cycle arrest in LP6 independently of RB expression. (A) Cell cycle analysis by propidium iodide staining in the LP6 line treated with siRNA for RB. The cells were fixed following 24-hour exposure of selinexor. (B) Protein expression analysis in the RB-knocked down LP6 lines following 24-hour exposure of selinexor.

**Supplementary Table S1: Cell lines for *in vitro* experiments and their sensitivity to selinexor**

| Histology                | Cell line   | IC <sub>50</sub> (nM) | Notes                                                         |
|--------------------------|-------------|-----------------------|---------------------------------------------------------------|
| GIST                     |             |                       |                                                               |
|                          | GIST-T1     | 69.1                  | Taguchi et al. Lab Inv 2002 (ref.39)                          |
|                          | GIST-T1/829 | 91.2                  | Imanitib-resistant subclone from GIST-T1                      |
|                          | PG27        | 55.2                  |                                                               |
| Liposarcoma              |             |                       |                                                               |
|                          | LP6         | 51.5                  | High-copy MDM2 amplification                                  |
|                          | LPS12       | 31.1                  | Low-copy MDM2 amplification                                   |
|                          | LPS141      | 71.3                  | High-copy MDM2 amplification                                  |
|                          | LPS510      | 121.6                 | Mutant p53                                                    |
| Leiomyosarcoma           |             |                       |                                                               |
|                          | LMS14       | 43.9                  |                                                               |
|                          | LMS17       | 101.3                 |                                                               |
|                          | LMS20       | 128.4                 |                                                               |
| Rhabdomyosarcoma         |             |                       |                                                               |
|                          | RMS559      | 66.1                  |                                                               |
|                          | RMS2        | 53.3                  |                                                               |
|                          |             |                       |                                                               |
| Undifferentiated sarcoma |             |                       |                                                               |
|                          | USCS2       | 49.5                  |                                                               |
|                          | USCS5       | 28.8                  |                                                               |
|                          | SCPS        | 218.2                 |                                                               |
| ASPS                     |             |                       |                                                               |
|                          | ASPS-KY     | 2099                  | Hoshino et al. Cancer genetics and cytogenetics 2009 (ref.40) |
|                          | ASPS-1      | 4262                  | Kenney at al. J Pediatr Hematol Oncol 2011 (ref.41)           |

\*GIST, gastrointestinal stromal tumor; ASPS, alveolar soft part sarcoma.

**Supplementary Table S2: Xenograft models**

| Histology                | Name of Model | Type of Model        | Notes                                                   |
|--------------------------|---------------|----------------------|---------------------------------------------------------|
| GIST                     |               |                      |                                                         |
|                          | PG20          | PDX                  | SDH deficient                                           |
|                          | PG27          | PDX                  | Corresponding to the cell line in Table 1               |
|                          | PG47          | PDX                  |                                                         |
| LPS                      |               |                      |                                                         |
|                          | LPS27         | PDX                  | High-copy MDM2 amplification                            |
| Leiomyosarcoma           |               |                      |                                                         |
|                          | LMS20         | PDX                  | Corresponding to the cell line in Table 1               |
| Undifferentiated sarcoma |               |                      |                                                         |
|                          | USCS2         | PDX                  | Corresponding to the cell line in Table 1               |
|                          | USCS5         | PDX                  | Corresponding to the cell line in Table 1               |
| ASPS                     |               |                      |                                                         |
|                          | ASPS-KY       | Cell line Xenografts | Corresponding to the cell line in Supplementary Table 1 |
|                          | ASPS-1        | PDX                  | Corresponding to the cell line in Supplementary Table 1 |

\*GIST, gastrointestinal stromal tumor; LPS, liposarcoma; ASPS, alveolar soft part sarcoma; PDX, patient derived xenograft.
